# Supplementary material for: Chitosan Oligosaccharides Coupling Inhibits Bacterial Biofilm-Related Antibiotic Resistance against Florfenicol
Source: MDPI journal article supplement (doi:10.3390/molecules25246043), 2020-12-21
Supplement: s1 [file s1]

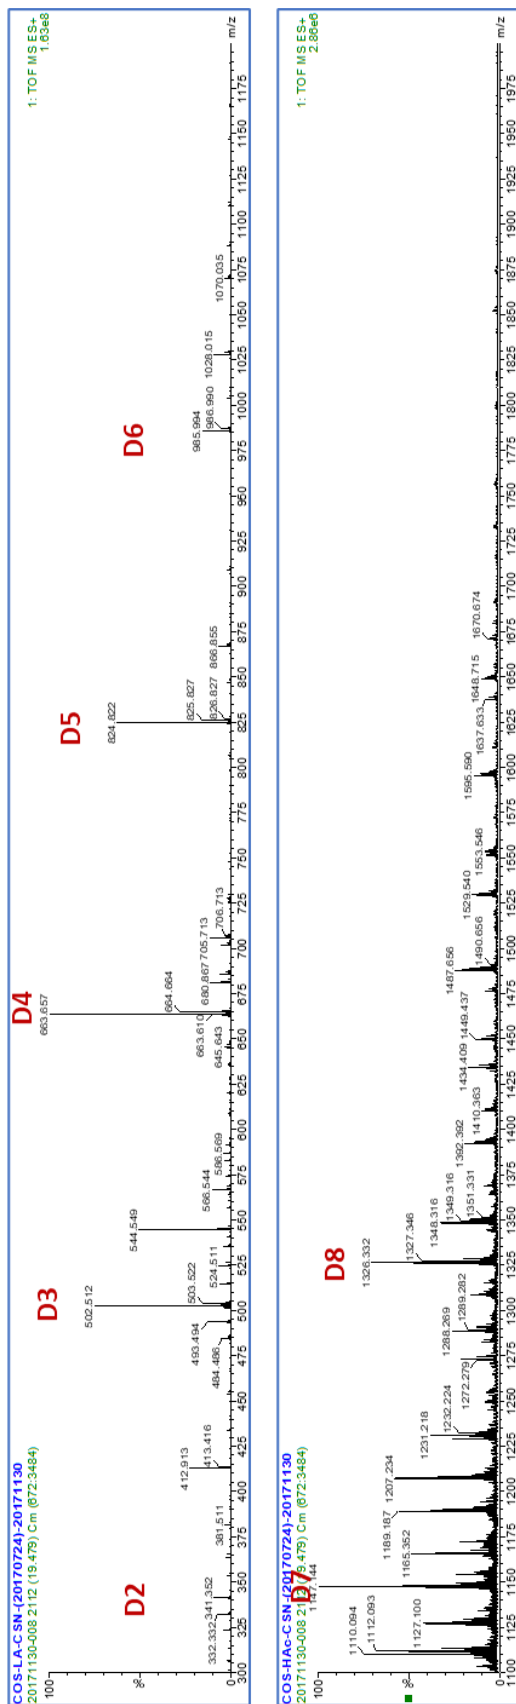

**Figure S1.** The characterization of COS by UPLC-Q TOF MS spectrometry in the positive ion mode.
